# Supplementary material for: Repair of noise-induced damage to stereocilia F-actin cores is facilitated by XIRP2 and its novel mechanosensor domain
Source: eLife. 2023 Jun 9;12:e72681. doi: 10.7554/eLife.72681 (PMC10259482; doi:10.7554/eLife.72681)
Supplement: Figure 1—source data 1. [file elife-72681-fig1-data1.xlsx]

## Sheet: Fig 1D
Quantification of stereocilia gap frequency
Cochlea	No Noise	Noise
1	2.43902	8.10811
2	0	14.2857
3	0	2.77778
4	11.6279	4.54545
5	2.7027	22.7273
6	7.89474	8.10811
7	5.40541	25.641
8	0

## Sheet: Fig 1E
Quantification of stereocilia gap frequency
Cochlea	No Noise	1 hour	8 hours	1 week
1	4.54545	43.5897	20.4545	11.6279
2	15.5556	15.9091	2.32558	8.69565
3	0	11.6279	16.6667	4.65116
4	7.14286	10.5263	10	0
5	2.27273	19.0476	0	0
6	2.43902	27.0833	4.44444	0
7	2.27273	21.9512	35.7143	3.0303

## Sheet: Fig 1F
Percentage of Dead Inner Hair Cells
		No Noise	1 hr	8 hrs	1 wk
Cochlea	1	0	0	0	0
	2	0	0	0	0
	3	0	0.740741	0	0
	4	0	0	0	0
	5	0	1.44928	0	0
	6	0	0	0	0
	7	0	0	7.14286	0

## Sheet: Fig 1G
Average number of tallest row IHC stereocilia
		No Noise	1 hr	8 hrs	1 wk
Cochlea	1	14.3333	13.8	14.6667	14.6667
	2	14.4	14.1333	14.8667	14.8667
	3	15.3833	14.4667	14.3333	14.3333
	4	14.6	15.8667	14.4	14.4
	5	14.8667	14.5333	12.7667	12.7667
	6	14.3333	14.9333	15.6667	15.6667
	7	15.3333	15.2	15.25	15.25
