# Supplementary material for: Repair of noise-induced damage to stereocilia F-actin cores is facilitated by XIRP2 and its novel mechanosensor domain
Source: eLife. 2023 Jun 9;12:e72681. doi: 10.7554/eLife.72681 (PMC10259482; doi:10.7554/eLife.72681)
Supplement: Figure 3—source data 1. [file elife-72681-fig3-data1.xlsx]

## Sheet: Figure 3J
XIRP2 Enriched Sites per Cell
Cochlea	No Noise	1hr	8hrs	1wk
1	0.133333	0.4375	0.470588	0.846154
2	0.0625	0.235294	0.142857	0.294118
3	0.0714286	0.571429	0.142857	0.785714
4	0.307692	0.0666667	0.133333	0.181818
5	0	0.666667	0.4	0
6	0.0769231	1	0.764706	0.5
7	0.230769	0.357143	0.571429	0.25
8	0.230769	0.538462	0.866667	0.285714
9	0.571429	0.9375	0.142857	0.352941
10	0.111111	0.3125	0.615385	0.5
11	0.2	0.230769	0.3125	0.461538
12	0	0.4375	0.266667	0
13	0.266667	0.222222	0.333333	0.25
14	0.428571	0.4	0.214286	0
15	0.133333	0.142857	0.285714	0.5
16	0.333333	0.2	0.2	0.230769
17	0	0.266667	0.0909091	0.285714
18	0	0.285714	0.388889	0.384615
19	0.2	0.416667	0.0714286	0.416667
20	0.230769	0.266667	0.6875	0
21	0	0.125	0.117647	0.166667
