# Supplementary material for: Repair of noise-induced damage to stereocilia F-actin cores is facilitated by XIRP2 and its novel mechanosensor domain
Source: eLife. 2023 Jun 9;12:e72681. doi: 10.7554/eLife.72681 (PMC10259482; doi:10.7554/eLife.72681)
Supplement: Figure 4—source data 1. [file elife-72681-fig4-data1.xlsx]

## Sheet: Fig 4B
Quantification of % of cells with gaps
Utricle	WT	XIRP2 KO
1	6.76056	20.5047
2	2.80612	17.5159
3	6.17849	16.5563
4	4	16.6113
5	7.1599	7.76256
6	4.58716	10.3448
7	2.95699
8	1.89125

## Sheet: Fig 4D
Quantification of % of cells with gaps
Cochlea	WT	XIRP2 KO
1	9.09091	20.5882
2	0	18.1818
3	0	10.2564
4	3.33333	8.51064
5	9.09091	15.3846
6	0	28.9474
7		15.3846

## Sheet: Fig 4E
Quantification of % of cells with gaps per cochlea
	WT																			XIRP2 KO
No Noise	2.7027	2.5641	16.6667	2.77778	0	4.7619	4.08163	0	5	0	6.97674	14.7059	0	5.40541	2.85714	4.87805	2.7027	0		15.625	7.69231	11.1111	7.14286	2.7027	12.1212	10.8108	6.66667	27.027	2.5641	5.12821	10.8108	11.7647	5.40541	10.5263	10.8108	14.6341
1 hr	17.5	5.40541	6.97674	27.2727	2.63158	2.5641	10.2564	18.6047	17.7778	8.57143	10.8108	47.619	11.7647	18.9189	14.2857	9.7561	8.10811	17.0732		22.2222	12.8205	0	14.6341	7.89474	11.4286	16.2162	11.1111	27.7778	14.6341	13.8889	43.9024	0	5.71429	2.94118	7.5	12.1951	19.5122
1 wk	2.43902	2.5	2.32558	2.38095	0	2.5641	5.40541	17.0732	2.77778	10.8696	22.5	0	5.40541	0	0	2.8169	5.55556	10	0	10.8108	13.9535	19.4444	23.2558	21.0526	4.7619	4.7619	5.40541	63.8889	24.4444	25	41.8605	25.641	16.6667	7.89474	18.4211	23.6842	15.7895	25.7143

## Sheet: Fig 4F
Percentage of Dead Inner Hair Cells per cochlea
	WT															XIRP2 KO
No Noise	0	0	0	0	0	0										0	0	0	0	0
1 hr	0	0	0	0	0	0										0	0	0	0	0	0
1 week	2.63	0	0	0	0											0	0	0	0	0

## Sheet: Fig 4G
Average number of tallest row IHC stereocilia per cochlea
	WT															XIRP2
No Noise	16.7912	16.3889	16.0079	15.6667	16.6488	16.5456										18.4643	15.6746	16.8095	17.0714	16.7083	15.5437
1hr	15.5714	16.2381	15.2341	16.3	16.6825	16.0556										17.9127	17.7063	16.4389	15.0556	16.1333	16.5556
1 week	16.1964	16.8	16.1111	16.4544	16.5694	16.373										16.6111	16.6333	16.7222	16.9	16.6667	16.1111
