# Supplementary material for: Repair of noise-induced damage to stereocilia F-actin cores is facilitated by XIRP2 and its novel mechanosensor domain
Source: eLife. 2023 Jun 9;12:e72681. doi: 10.7554/eLife.72681 (PMC10259482; doi:10.7554/eLife.72681)
Supplement: Figure 5—source data 1. [file elife-72681-fig5-data1.xlsx]

## Sheet: Fig 5J
Normalized immunofluorescence of gamma-actin at stereocilia gaps
		WT	XIRP2 KO
Utricle	1	1.34448	1.335
		2.30036	1.108
		2.28664	1.16235
		1.9	1.25258
	2	1.42143	1.35875
		1.343	1.11714
		1.84167	1.13471
		1.08667	1.06368
	3	2.45905	1.04556
		1.881	1.126
		2.54429	0.97
		2.0395	1.222
	4	2.77789	0.938333
		2.065	1.27286
		2.89667	2.09833
		2.07	1.91091
	5	2.04857	1.015
		1.93214	1.595
		1.4125	1.54
		1.54	1.0519
	6	2.01167	1.238
		1.578	1.36353
		1.82538	1.51552
		1.93063	1.2
	7	2.34333	1.14429
		4.62917	1.18625
		1.72222	1.34818
		1.66455	1.69706

## Sheet: Fig 5K
Normalized immunofluorescence of gamma-actin at stereocilia gaps
Cochlea	WT	XIRP2 KO
1	4.75368	2.50959
2	4.30769	2.82213
3	2.89338	1.33287
4	3.89247	2.17063
5	3.38754	2.40873
6	3.06812	2.35338
7	4.17813	4.48
8	3.8271	3.37724
9		1.32324
10		2.52428

## Sheet: Fig 5L
Normalized immunofluorescence of beta-actin at stereocilia gaps
Utricle	WT	XIRP2 KO
1	1.28784	1.0951
2	1.42452	1.11388
3	1.13236	1.26466
4	1.54519	1.04465
5	1.86014	1.16072
6	1.43135	1.18399
7	1.57374
8	1.26392

## Sheet: Fig 5M
Normalized immunofluorescence of espin at stereocilia gaps
	WT	XIRP2 KO
1	1.22462	0.960512
2	1.25684	0.919793
3	1.09362	1.00915
4	1.1351	0.774667
5	1.34752	0.86224
6	1.01004	0.95847
7	1.28505
8	1.12363
