# Supplementary material for: Repair of noise-induced damage to stereocilia F-actin cores is facilitated by XIRP2 and its novel mechanosensor domain
Source: eLife. 2023 Jun 9;12:e72681. doi: 10.7554/eLife.72681 (PMC10259482; doi:10.7554/eLife.72681)
Supplement: Figure 6—source data 1. [file elife-72681-fig6-data1.xlsx]

## Sheet: Fig 6H
immunofluorescence of XIRP2 at stereocilia gaps per utricle
	WT	XIRP2-ΔCterm
	1.30966	0.972806
	1.25208	0.805914
	1.33349	0.778979
	1.28982	0.90391
	1.28567	0.810145
	1.17601	0.79698
	1.3165	0.856831
	1.21267

## Sheet: Fig 6J
immunofluorescence of gamma actin at stereocilia gaps per utricle
	WT	XIRP2 KO	XIRP2-𝝙Cterm
	2.59	1.262	1.348
	1.958	1.436	1.101
	1.423	1.19	1.662
	2.231	1.156	1.313
	2.452	1.189	1.024
	1.733	1.215	1.57
	1.836	1.555	1.363

## Sheet: Fig 6K
% of cells with gaps
Utricle	WT	XIRP2 KO	XIRP2-ΔLIM/CTD
1	6.76056	20.5047	9.02778
2	2.80612	17.5159	7.97101
3	6.17849	16.5563	9.05923
4	4	16.6113	14.3813
5	7.1599	7.76256	5.42373
6	4.58716	10.3448	9.90991
7	2.95699
8	1.89125

## Sheet: Fig 6L
% of cells with gaps
Cohclea	WT	XIRP2 KO	XIRP2-ΔLIM/CTD
1	9.09091	20.5882	28.125
2	0	18.1818	5.71429
3	0	10.2564	6.25
4	3.33333	8.51064	22.5806
5	9.09091	15.3846	25.5814
6	0	28.9474	12.5
7		15.3846	23.5294
