# Supplementary material for: Repair of noise-induced damage to stereocilia F-actin cores is facilitated by XIRP2 and its novel mechanosensor domain
Source: eLife. 2023 Jun 9;12:e72681. doi: 10.7554/eLife.72681 (PMC10259482; doi:10.7554/eLife.72681)
Supplement: Figure 6—source data 2. [file elife-72681-fig6-data2.xlsx]

## Sheet: Fig 6M
	XIRP2-𝝙LIM/CTD ABRs
		WT															XIRP2-ΔLIM/CTD
Frequency (kHz)	8	70	30	45	45	25	25	40	35	40	40	65	50	70	40		50	40	40	40	45	35	70	50
	11.3	70	35	50	60	40	25	45	40	45	50	85	60	80	45		60	50	45	35	55	40	90	70
	16	60	40	55	40	35	25	50	40	40	60	75	55	95	45		65	55	65	35		35	105	105
	22.4	65	35	50	70	40	25	40	40	35	45	65	50	75	40		40	50	50	40		35	95	65
	32	55	30	60	65	55	15	65	40	45	60	70	50	75	65		55	70	65	50		50	90	85
