# Supplementary material for: Repair of noise-induced damage to stereocilia F-actin cores is facilitated by XIRP2 and its novel mechanosensor domain
Source: eLife. 2023 Jun 9;12:e72681. doi: 10.7554/eLife.72681 (PMC10259482; doi:10.7554/eLife.72681)
Supplement: Figure 7—source data 1. [file elife-72681-fig7-data1.xlsx]

## Sheet: Fig 7 D XIRP2-FL
XIRP2 full length FL construct
Normalized Fluorescence Intensity Fold Change - FL construct
	Frame
Cell	0	1	2	3	4	5	6	7	8	9	10	11	12	13	14	15	16	17	18	19	20	21	22	23	24	25	26	27	28	29	30	31	32	33	34	35	36	37	38	39	40	41	42	43	44	45	46	47	48
0	0.167973	0.164331	0.144193	0.120899	0.110739	0.132226	0.102569	0.109574	0.0913758	0.106707	0.118459	0.123304	0.134473	0.143784	0.132206	0.153621	0.17098	0.130592	0.0770412	0.0393774	0.000856038	-0.0154749	-0.021868	-0.00512353	-0.0107662	-0.0148946	-0.0293826	-0.0311163	-0.0339329	-0.0244475	-0.0392487	-0.0418457	-0.042173	-0.0376427	-0.0205503	-0.0495646	-0.0307781	-0.0637349	-0.0457032	-0.0451863	-0.0475532	-0.079592	-0.0515211	-0.0557139	-0.0612095	-0.0585565	-0.0540851	-0.0527661	-0.0390055
1	0.360292	0.315653	0.26957	0.220268	0.200466	0.133092	0.10177	0.0848128	0.169665	0.164349	0.162303	0.16908	0.168176	0.186873	0.224306	0.242456	0.445278	0.571068	0.642839	0.651755	0.574208	0.54982	0.461358	0.438829	0.503749	0.513514	0.485888	0.459908	0.426265	0.390157	0.34735	0.321606	0.319779	0.296588	0.303445	0.331484	0.298857	0.304678	0.284837	0.294975	0.316057	0.313147	0.345534	0.355603	0.354663	0.335791	0.340514	0.368283	0.369296
2	0.190957	0.16796	0.133773	0.108703	0.108818	0.108255	0.100676	0.0995959	0.104589	0.10798	0.126783	0.11024	0.133251	0.121034	0.14049	0.307936	0.335338	0.295518	0.266073	0.230364	0.17328	0.171738	0.138971	0.141366	0.112278	0.119869	0.109583	0.114166	0.103558	0.112861	0.151067	0.187056	0.231246	0.217108	0.239353	0.195121	0.223297	0.239905	0.238869	0.231644	0.25201	0.24758	0.277994	0.31133	0.329672	0.38782	0.393133	0.395139	0.401564
3	0.15075	0.142218	0.129553	0.119041	0.115042	0.125322	0.104915	0.100932	0.105454	0.0990989	0.110496	0.0926623	0.106343	0.102626	0.110189	0.0878503	0.184823	0.231546	0.256917	0.268196	0.293857	0.27972	0.28906	0.291867	0.294181	0.302081	0.269338	0.261733	0.223648	0.196158	0.193585	0.246762	0.242287	0.227736	0.213055	0.217834	0.22217	0.206748	0.207139	0.206336	0.217197	0.203513	0.182177	0.2094	0.194714	0.199764	0.188914	0.194012	0.176071
4	0.129599	0.126809	0.11852	0.126977	0.111092	0.121372	0.107139	0.104518	0.118786	0.120418	0.11945	0.112111	0.121402	0.118689	0.127842	0.0824729	0.0885598	0.0980623	0.104101	0.0973413	0.101217	0.10292	0.105303	0.100538	0.106908	0.108754	0.104779	0.101351	0.102601	0.10053	0.119953	0.1293	0.103624	0.130067	0.129445	0.101892	0.160131	0.151374	0.172663	0.172265	0.193761	0.162085	0.188234	0.159822	0.164303	0.165655	0.158892	0.184265	0.173637
5	0.101383	0.0852568	0.0782327	0.0848394	0.0863917	0.0785133	0.0847931	0.0910853	0.0873323	0.0889302	0.0892157	0.0988586	0.101955	0.0888695	0.0936043	0.0500449	0.0735728	0.102545	0.107181	0.120304	0.116963	0.120565	0.158989	0.16631	0.155636	0.164892	0.174289	0.185796	0.17756	0.178142	0.15617	0.187603	0.186786	0.208963	0.208136	0.214177	0.219361	0.23531	0.249247	0.251794	0.255797	0.241404	0.239404	0.287602	0.266829	0.262867	0.27021	0.262075	0.272763
6	0.197429	0.182852	0.205019	0.219088	0.185901	0.194122	0.223901	0.227642	0.230094	0.219534	0.202073	0.237197	0.221786	0.215944	0.249613	0.0908354	0.124663	0.168657	0.231496	0.261545	0.251648	0.222467	0.203474	0.189125	0.168212	0.14985	0.150471	0.192903	0.202054	0.195327	0.195988	0.217224	0.233642	0.236176	0.244704	0.247439	0.283567	0.272547	0.240844	0.272712	0.293956	0.311293	0.313127	0.323022	0.332842	0.408421	0.411222	0.426589	0.448982
7	0.189949	0.170716	0.161934	0.16536	0.127947	0.12733	0.123123	0.139065	0.140773	0.121655	0.108673	0.138669	0.148579	0.161103	0.187476	0.150487	0.195986	0.234103	0.183001	0.0834081	0.0619019	0.0511138	0.0606594	0.0767756	0.06725	0.0581047	0.0520446	0.0330454	0.0555425	0.0509158	0.0282667	0.04232	0.0350028	0.0348296	0.0402004	0.0241824	0.00693467	0.00295281	0.00531607	0.0364103	0.0341912	-0.00858411	0.0334957	0.0350597	0.035279	0.0664538	0.0267049	0.0333218	0.0508842
8	0.10978	0.124844	0.129303	0.134437	0.106023	0.103849	0.108477	0.112095	0.116866	0.102662	0.112124	0.111013	0.111785	0.121101	0.106432	0.0837233	0.0922036	0.0950983	0.112525	0.125683	0.122546	0.184695	0.180736	0.196813	0.200408	0.198304	0.19868	0.194433	0.20176	0.203706	0.223482	0.184366	0.180014	0.194798	0.201072	0.17258	0.178367	0.166568	0.19153	0.199583	0.168924	0.187376	0.164631	0.176683	0.156195	0.186426	0.196771	0.165259	0.185464
9	0.130684	0.102587	0.0805461	0.0832886	0.0799861	0.0747076	0.0686889	0.0695968	0.0643304	0.0734952	0.0767453	0.0909312	0.0879478	0.103715	0.111852	0.0855903	0.174905	0.200547	0.257815	0.308187	0.351101	0.397196	0.454056	0.47514	0.538551	0.586207	0.643577	0.690764	0.71517	0.756621	0.759415	0.789394	0.767241	0.800249	0.845917	0.840255	0.838995	0.845767	0.899037	0.921492	0.97142	0.981643	0.971021	1.01793	1.04192	1.09907	1.0712	1.0974	1.09302
Normalized Fluorescence Intensity Fold Change - Actin
	Frame
Cell	0	1	2	3	4	5	6	7	8	9	10	11	12	13	14	15	16	17	18	19	20	21	22	23	24	25	26	27	28	29	30	31	32	33	34	35	36	37	38	39	40	41	42	43	44	45	46	47	48
0	0.0468759	0.0385484	0.0354113	0.0229143	0.0188165	0.0176417	0.00881228	-0.00204403	-0.00538966	0.00354387	-0.00147515	0.0083049	0.00162688	0.00348137	0.000217657	-0.0587872	-0.0910957	-0.152828	-0.161608	-0.172407	-0.161453	-0.165285	-0.15898	-0.176813	-0.158728	-0.151163	-0.152381	-0.160727	-0.159367	-0.167385	-0.179137	-0.171318	-0.182753	-0.167475	-0.167643	-0.185558	-0.172214	-0.170061	-0.180938	-0.166705	-0.173772	-0.176761	-0.164771	-0.174653	-0.164785	-0.173945	-0.172235	-0.167178	-0.153817
1	0.275553	0.241435	0.211889	0.184579	0.129881	0.0864291	0.0378106	-0.0226907	0.0802151	0.0512302	0.0466771	0.0119521	0.0313703	0.0223537	0.00881286	0.041251	0.25876	0.355434	0.393021	0.393921	0.302849	0.293643	0.276725	0.256562	0.330132	0.33067	0.360125	0.368082	0.31451	0.308041	0.278752	0.296706	0.29374	0.263655	0.33475	0.363191	0.329602	0.291017	0.297997	0.295133	0.306767	0.352481	0.318852	0.40076	0.359858	0.358013	0.383952	0.37863	0.374703
2	0.21132	0.121007	0.125706	0.101654	0.036816	0.0142577	0.00914293	0.00405318	0.0232677	0.0142024	0.0110863	0.0124671	0.000104056	-0.00218577	-0.0109392	0.0916838	0.139957	0.0943668	0.101783	0.044946	0.00502112	-0.000360658	-0.0316942	-0.0679173	-0.0316985	-0.0238934	-0.0449602	-0.0582881	-0.0679932	-0.0467538	-0.0403508	-0.0665467	-0.0551333	-0.0526705	-0.0601815	-0.0284819	-0.0429741	-0.0364634	-0.048525	-0.0399713	-0.0420369	-0.0720687	-0.0832245	-0.0647368	-0.0559659	0.00755336	0.0145837	0.0194014	-0.00378756
3	0.0633323	0.0555898	0.0344384	0.0270056	0.0165543	0.0159662	0.00429183	0.00323848	0.00303383	-0.0150855	-0.0100069	-0.0176733	-0.0103558	-0.0180888	-0.00657471	-0.0282665	0.0171495	0.0499124	0.0886405	0.0764307	0.0889839	0.0926076	0.0640071	0.056882	0.0474378	0.0278749	0.0117164	0.000419381	-0.0307793	-0.0648733	-0.0943193	-0.0137991	-0.0130954	-0.0384662	-0.0450526	-0.0606523	-0.0511725	-0.0571429	-0.0509397	-0.0498272	-0.0643679	-0.0694323	-0.078438	-0.0834099	-0.0905779	-0.0832729	-0.106339	-0.0973377	-0.109707
4	0.0325759	0.023638	0.0190435	0.0183735	0.0208968	0.0145876	0.0203065	0.00454291	0.030781	0.0149005	0.000108848	-0.000451435	0.00545056	-0.00505379	-0.00921641	-0.0961013	-0.0896557	-0.0732669	-0.0780158	-0.0673587	-0.0390293	-0.0314706	-0.0631276	-0.0364743	-0.0522349	-0.0592856	-0.0576804	-0.0557662	-0.0743546	-0.078175	-0.0747578	-0.0523202	-0.0704457	-0.0646518	-0.0819774	-0.10291	-0.095613	-0.0867461	-0.0626607	-0.0768928	-0.0823981	-0.0914751	-0.0959987	-0.0999271	-0.0824309	-0.113316	-0.0947953	-0.0912809	-0.105127
5	0.0454015	0.0396275	0.0201697	0.0195691	0.0156785	-0.0022405	-0.00564159	-0.00830408	-0.0032387	-0.0101127	-0.00447709	-0.00626217	0.00701359	-0.00428202	-0.00339045	-0.0461988	-0.0210581	-0.0147933	-0.0336758	-0.0259764	0.00158903	0.00270997	-0.00232645	-0.0150335	-0.0238197	-0.0233464	-0.013327	-0.0295986	-0.0263854	-0.053595	-0.0319002	-0.0230796	-0.0675336	-0.0435782	-0.0712315	-0.056954	-0.0280495	-0.0278768	-0.0264838	-0.00836537	-0.0241556	-0.0456098	-0.0381389	-0.0319523	-0.054965	-0.0485187	-0.0440298	-0.0689746	-0.0764675
6	0.0959749	0.10829	0.112313	0.0989351	0.0787042	0.0996368	0.0945873	0.0798414	0.079214	0.0804038	0.0747544	0.0653594	0.0598572	0.0798443	0.0870653	-0.162797	-0.127949	-0.107448	-0.0864939	-0.0829961	-0.0856763	-0.0740886	-0.0294273	-0.0401661	-0.0440298	-0.00985536	0.103791	0.117116	0.157912	-0.0208133	0.141452	0.191516	0.250134	0.262049	0.318308	0.339098	0.332905	0.340233	0.379158	0.432441	0.436209	0.513791	0.545877	0.511869	0.575727	0.728416	0.858026	0.708452	0.946909
7	0.0803061	0.0489796	0.0578921	0.0309134	0.0349558	0.0394383	0.0183246	0.00575507	-0.00370218	0.00909369	0.0204877	0.0388939	0.0494071	0.0626279	0.0927872	-0.0534583	0.0114905	-0.00691243	-0.0284887	-0.0950458	-0.0922272	-0.083963	-0.0784546	-0.048044	-0.0862767	-0.0971123	-0.0727038	-0.0649161	-0.0859284	-0.0632706	-0.0757009	-0.0577784	-0.0810378	-0.0679174	-0.0719229	-0.0634472	-0.0953974	-0.105842	-0.0805819	-0.0847933	-0.0732258	-0.111629	-0.131351	-0.109749	-0.122562	-0.1363	-0.146224	-0.122802	-0.131172
8	0.0519946	0.0342566	0.0363579	0.0182589	0.0201033	-0.00351979	0.00819543	0.00253448	0.000530528	-0.0013486	-0.00686331	0.000378304	0.0166912	0.00240145	0.0196838	-0.0989593	-0.0811295	-0.0570322	-0.00578835	-0.00396485	0.0769258	0.218635	0.150034	0.135826	0.169326	0.153677	0.12555	0.264215	0.273476	0.241263	0.201306	0.129741	0.152142	0.0986412	0.15881	0.124231	0.0671538	0.200045	0.116896	0.113678	0.0721374	0.0908689	0.0765362	-0.0147913	0.0032774	0.0225065	-0.00056651	0.0366554	-0.0165043
9	0.0439373	0.0281134	0.0410935	0.0268104	0.00926735	0.00562051	0.0123626	-0.00633531	0.00663346	0.0111304	0.00674675	0.00455929	0.00465083	0.022061	0.0357407	-0.096395	-0.0650003	-0.0561636	-0.0216135	-0.0257099	-0.0268812	-0.0349798	-0.0164199	0.00418031	0.0148375	0.0307972	0.0773196	0.0590221	0.0642753	0.0696449	0.0613627	0.0730359	0.0708893	0.0873351	0.0733852	0.0813113	0.0980512	0.104666	0.113779	0.106337	0.133305	0.11435	0.123525	0.159306	0.144039	0.161646	0.160892	0.185403	0.185595
Frame Interval = 1.5 s
[truncated: 66 more columns]

## Sheet: Fig 7 G LIM_only
LIM_only XIRP2 construct
Normalized Fluorescence Intensity Fold Change - LIM_only construct
	Frame
Cell	0	1	2	3	4	5	6	7	8	9	10	11	12	13	14	15	16	17	18	19	20	21	22	23	24	25	26	27	28	29	30	31	32	33	34	35	36	37	38	39	40	41	42	43	44	45	46	47	48
0	0.1206	0.115187	0.106537	0.100205	0.106287	0.107586	0.124741	0.133529	0.127918	0.129016	0.129107	0.136341	0.124911	0.131259	0.134889	-0.099474	0.00637649	0.0202517	0.0448506	0.0564679	0.0605814	0.0586816	0.0704306	0.0784534	0.0861663	0.0881366	0.100112	0.108018	0.106603	0.110262	0.116883	0.127531	0.145702	0.146879	0.138646	0.139658	0.134874	0.134429	0.119318	0.123722	0.125739	0.139491	0.138664	0.138646	0.138288	0.141859	0.142001	0.132525	0.139724
1	0.129584	0.0969542	0.101936	0.108759	0.104327	0.121539	0.111432	0.0857448	0.11164	0.0830663	0.0421303	0.0824229	0.106636	0.0634106	0.0656326	-0.15812	0.037713	0.0277234	0.0693328	0.0810353	0.101161	0.119702	0.13825	0.142192	0.147236	0.16384	0.105733	0.108719	0.105867	0.106337	0.10847	0.124525	0.113227	0.114983	0.136047	0.15545	0.141585	0.148969	0.102583	0.106514	0.0842738	0.102831	0.104648	0.115323	0.12344	0.110343	0.134716	0.119066	0.124019
2	0.121745	0.0412214	0.0561506	0.0610931	0.0525311	0.0530809	0.086052	0.0966651	0.0874134	0.0787072	0.108877	0.111289	0.0933529	0.0969292	0.0964607	-0.215284	0.0407105	0.121185	0.146767	0.190743	0.212395	0.219089	0.21721	0.0962103	0.0860998	0.09771	0.074694	0.0686568	0.0456236	0.0903294	0.0620497	0.0933252	0.0903754	0.0991347	0.113213	0.120242	0.144184	0.163338	0.135067	0.152747	0.169737	0.136722	0.178461	0.190605	0.169044	0.154877	0.16938	0.183017	0.196364
3	0.0841967	0.0875619	0.0867928	0.0795539	0.0841228	0.0794109	0.0831326	0.0789103	0.0806681	0.0780546	0.0730004	0.0720652	0.0727006	0.0885482	0.0817476	-0.0510314	0.152323	0.109004	0.0869085	0.0779447	0.0654057	0.0664923	0.0595391	0.0619267	0.0627063	0.0471888	0.0584673	0.0459618	0.0407636	0.0431956	0.0354798	0.0431709	0.0403359	0.0490628	0.0559592	0.0538759	0.0490852	0.0643251	0.0467968	0.0574	0.0539655	0.0516361	0.046935	0.0495166	0.0449293	0.0579611	0.0614512	0.0525076	0.0480852
4	0.126858	0.123903	0.151133	0.140777	0.141891	0.080996	0.0892507	0.0722927	0.0901899	0.111198	0.10335	0.0985748	0.118755	0.117685	0.101245	-0.238551	-0.061829	-0.0149577	0.018638	0.0366712	0.0336683	0.0603382	0.0734884	0.0889926	0.0912962	0.106802	0.100495	0.108793	0.114296	0.112205	0.0195113	0.0233338	0.0219547	0.0274929	0.0481352	0.0272567	0.0352822	0.0251976	0.0275677	0.0139126	0.00435387	0.0178379	0.0317099	0.0431401	0.0499808	0.0512955	0.0458047	0.0475974	0.0635399
5	0.126029	0.127867	0.11341	0.120169	0.128295	0.03805	0.0191849	0.0159951	0.0208044	0.0511242	0.0683121	0.0734734	0.0606837	0.0637054	0.0755416	-0.266486	0.0584352	0.130853	0.175982	0.163889	0.209873	0.210447	0.229154	0.263247	0.307427	0.348829	0.406077	0.447251	0.489093	0.49711	0.464122	0.475328	0.438528	0.443463	0.448841	0.462532	0.421678	0.471132	0.453759	0.463727	0.468767	0.433472	0.439566	0.444338	0.434024	0.470822	0.480242	0.437901	0.453642
6	0.0965958	0.0811279	0.0885478	0.086246	0.0735426	0.0649783	0.0592662	0.0525539	0.0574001	0.0749539	0.0796717	0.0866412	0.084624	0.0779585	0.0720636	-0.149237	0.00538743	0.0656575	0.114147	0.152365	0.163037	0.176529	0.159136	0.185904	0.211255	0.212788	0.208758	0.0732555	0.0877008	0.078244	0.0683299	0.0756871	0.0804699	0.0909391	0.107059	0.10902	0.130151	0.123543	0.14193	0.164504	0.182214	0.208747	0.183539	0.191787	0.187885	0.20873	0.17683	0.180596	0.193194
7	0.0533711	0.0650074	0.0689281	0.0789385	0.0894644	0.0731179	0.0770516	0.0699909	0.0753906	0.0695576	0.0730535	0.0876798	0.0904665	0.0927613	0.0928678	-0.225016	-0.0246179	0.0298283	0.0415675	0.048369	0.0633099	0.0538447	0.0656528	0.0714525	0.0897497	0.100729	0.0976635	0.10613	0.0942139	0.0957963	0.102053	0.0986478	0.117571	0.119062	0.125064	0.1233	0.133041	0.136556	0.143063	0.160664	0.156815	0.142368	0.117649	0.110362	0.129992	0.113984	0.120812	0.126918	0.113767
8	0.199785	0.214345	0.150968	0.139978	0.0959295	0.086342	0.0748274	0.0803044	0.049978	0.0516861	0.0312657	0.0352528	0.0414046	0.0239631	0.0186808	-0.0722758	0.183565	0.214681	0.142395	0.0459038	-0.00348615	-0.04281	-0.0698904	-0.0792365	-0.0729988	-0.0804057	-0.069082	-0.0598803	-0.05518	-0.0506911	-0.027492	-0.0321131	-0.0288109	-0.024529	0.00412983	0.00347334	0.00949919	0.00365451	-0.0207141	-0.00435142	-0.0356783	-0.0368043	-0.0395735	-0.0266017	-0.0349029	-0.0559839	-0.0813609	-0.0698843	-0.118532
9	0.121118	0.122379	0.127147	0.124832	0.130396	0.111241	0.121498	0.11791	0.117122	0.12549	0.118978	0.106501	0.112081	0.115755	0.103555	-0.172942	-0.0167551	-0.00691051	0.00343685	0.0355754	0.0249025	0.0606952	0.0335177	0.0592264	0.0561943	0.044747	0.0359938	0.0435089	0.0498193	0.057387	0.0518494	0.0613749	0.0496601	0.0552263	0.0711274	0.0631036	0.0778449	0.0717158	0.0574771	0.0668777	0.078899	0.0763132	0.0582785	0.0792656	0.0683885	0.0801916	0.0781525	0.0694695	0.0693146
Normalized Fluorescence Intensity Fold Change - Actin
	Frame
Cell	0	1	2	3	4	5	6	7	8	9	10	11	12	13	14	15	16	17	18	19	20	21	22	23	24	25	26	27	28	29	30	31	32	33	34	35	36	37	38	39	40	41	42	43	44	45	46	47	48
0	0.00824658	0.00600644	-0.00187169	0.0047138	0.00689195	-0.00875842	0.00238643	0.0163951	0.00530443	-0.0113005	0.012845	-0.00404879	-0.00332876	-0.0131374	-0.0167673	-0.132623	-0.188288	-0.217154	-0.157892	-0.135824	-0.169568	-0.149677	-0.124689	-0.128456	-0.114872	-0.137957	-0.0599261	-0.100911	-0.110194	-0.0949448	-0.125876	-0.0895963	-0.0684387	-0.0959806	-0.0618259	-0.105701	-0.0726263	-0.0930004	-0.09684	-0.105805	-0.0400579	-0.0857913	-0.116943	-0.0819907	-0.101464	-0.0789853	-0.0999559	-0.0783072	-0.0505692
1	0.0563215	0.0144124	0.0276573	0.0317099	0.0253698	0.023746	-0.0111973	0.0170847	-0.00121951	0.0103365	-0.0231868	0.00207458	-0.0169506	-0.0231489	0.00247479	-0.205282	-0.179579	-0.152673	-0.12163	-0.120573	-0.113844	-0.0877591	-0.0926109	-0.0613696	-0.0724206	-0.0719726	-0.0817266	-0.0647141	-0.0388692	-0.0399262	-0.0409851	-0.0179161	-0.035922	-0.026841	-0.0200273	-0.0168564	-0.0345693	-0.048555	-0.0685924	-0.0723418	-0.0623313	-0.0652298	-0.0459133	-0.0420196	-0.0667763	-0.0577717	-0.038518	-0.0415293	-0.0405084
2	0.0562859	0.00559829	0.0152893	0.0130585	-0.0155831	0.012979	0.0147006	-0.00463241	0.016246	0.0114586	0.00293118	0.00401205	-0.0144922	-0.0121019	-0.0220221	-0.302076	-0.250866	-0.20516	-0.143998	-0.156466	-0.200909	-0.205798	-0.292561	-0.305122	-0.351266	-0.357599	-0.368066	-0.365198	-0.349385	-0.384187	-0.371721	-0.341317	-0.331307	-0.322782	-0.289372	-0.304045	-0.259238	-0.264525	-0.2739	-0.252862	-0.249689	-0.245125	-0.245651	-0.227776	-0.226124	-0.241595	-0.247324	-0.255149	-0.307401
3	0.0337542	5.8591e-05	0.0104474	0.0257891	0.0192956	0.00296612	0.0103692	0.0260097	-0.0115525	0.000364541	-0.0102744	-0.000949226	-0.00584647	-0.0110031	-0.027248	-0.275494	-0.257722	-0.231402	-0.240747	-0.241571	-0.206066	-0.184431	-0.194807	-0.188353	-0.178269	-0.159742	-0.175729	-0.193213	-0.173498	-0.165512	-0.160287	-0.130504	-0.175871	-0.156003	-0.152527	-0.156096	-0.161767	-0.148224	-0.137085	-0.145471	-0.137631	-0.156724	-0.140119	-0.154721	-0.132398	-0.155421	-0.140171	-0.187183	-0.159796
4	0.0430371	0.0249688	0.033112	0.0101055	-0.066566	-0.000817305	0.00214186	0.0138334	0.00650074	0.00120015	-0.0063545	0.00120939	-0.00654153	-0.00237249	-0.00519921	-0.317782	-0.27754	-0.306825	-0.323951	-0.303238	-0.305625	-0.243482	-0.257706	-0.277176	-0.278354	-0.224003	-0.245482	-0.201296	-0.237738	-0.206469	-0.220846	-0.225644	-0.233778	-0.224996	-0.216105	-0.220226	-0.248538	-0.22402	-0.219134	-0.211353	-0.221455	-0.232928	-0.220804	-0.222349	-0.197147	-0.239159	-0.185672	-0.20664	-0.209249
5	0.0574017	0.0599646	0.0605608	0.0459812	-0.0234494	-0.0136319	-0.0325847	-0.0155605	-0.00486825	-0.00220471	0.0277769	0.0204061	0.00741201	0.022543	0.0222702	-0.107097	-0.055336	-0.0926365	-0.00052917	-0.0911779	-0.0310745	-0.0368309	0.0174149	0.0502296	0.0965547	0.0715381	0.155835	0.190921	0.224049	0.185661	0.157638	0.175428	0.200839	0.195923	0.201647	0.169397	0.155014	0.084998	0.0896862	0.0932202	0.0654733	0.0674069	0.0552608	0.0693161	0.0814925	0.0420565	0.053887	0.0689642	0.101613
6	0.0352699	0.0382003	0.0351905	0.0409675	0.0311006	0.00710078	0.00854081	0.015391	0.0474536	0.025151	0.0222883	0.0247372	0.0289951	0.00923654	0.0162237	-0.119978	-0.0858645	-0.179027	-0.215097	-0.221138	-0.210387	-0.196223	-0.222187	-0.209509	-0.22151	-0.248119	-0.253927	-0.0990046	-0.174233	-0.148889	-0.135676	-0.100125	-0.0537517	-0.0860513	-0.0880825	-0.0778506	-0.164383	-0.0191328	0.0362653	-0.0247841	0.0924171	0.0618813	0.034541	0.0627815	-0.00308415	0.0922523	0.0507638	0.02363	-0.0537105
7	0.00790504	0.0161713	0.0263573	0.0159557	0.0141206	0.0162044	0.0147355	0.00307832	0.0207549	0.0195458	0.0060991	0.00250661	0.00580485	0.00965823	0.00492554	-0.291697	-0.29935	-0.27993	-0.227977	-0.198179	-0.159123	-0.14332	-0.1589	-0.132973	-0.128387	-0.128553	-0.0983577	-0.10639	-0.0764156	-0.108123	-0.106177	-0.149624	-0.0931176	-0.117413	-0.119798	-0.152087	-0.0921875	-0.0983984	-0.119069	-0.0895466	-0.0855481	-0.0978666	-0.0849742	-0.0902105	-0.0865988	-0.111855	-0.0730861	-0.0910041	-0.0947139
8	0.10928	0.0797423	0.0655815	0.0375748	0.0317393	0.00692198	0.00284223	-0.00407053	-0.0209655	-0.0248179	-0.0307491	-0.0378009	-0.0410271	-0.0445979	-0.054927	-0.268483	-0.0810296	-0.171802	-0.229844	-0.246604	-0.285692	-0.28041	-0.250945	-0.212833	-0.214696	-0.215229	-0.207296	-0.190516	-0.190722	-0.155999	-0.169134	-0.132434	-0.144206	-0.136633	-0.158787	-0.145412	-0.117697	-0.1268	-0.133258	-0.141362	-0.150154	-0.129693	-0.129205	-0.133359	-0.13988	-0.143987	-0.186825	-0.172541	-0.198273
9	0.0207612	0.0276979	0.0153542	0.0133325	0.0121372	0.00632087	0.000946462	0.00264136	-0.00363355	-0.0212394	0.00370474	0.0030097	-0.0207001	-0.00742578	-0.0355762	-0.270073	-0.232717	-0.269778	-0.258617	-0.225992	-0.22522	-0.215341	-0.187908	-0.205388	-0.188376	-0.19309	-0.174016	-0.169912	-0.200807	-0.163751	-0.175113	-0.162105	-0.147291	-0.171662	-0.156446	-0.17694	-0.17763	-0.136141	-0.179682	-0.134796	-0.0964032	-0.179891	-0.15827	-0.175086	-0.138002	-0.189494	-0.165926	-0.211731	-0.151721
Frame Interval = 1.5 s
[truncated: 66 more columns]

## Sheet: Fig 7J C-term
C-term XIRP2 construct
Normalized Fluorescence Intensity Fold Change - C-term construct
	Frame
Cell	0	1	2	3	4	5	6	7	8	9	10	11	12	13	14	15	16	17	18	19	20	21	22	23	24	25	26	27	28	29	30	31	32	33	34	35	36	37	38	39	40	41	42	43	44	45	46	47	48
0	0.155803	0.157939	0.147588	0.132934	0.117206	0.12997	0.112254	0.110703	0.112755	0.127321	0.103967	0.132592	0.122042	0.125686	0.12273	0.0291216	0.101332	0.139875	0.19377	0.234228	0.269814	0.321458	0.307951	0.325004	0.361583	0.363692	0.406837	0.411397	0.419942	0.424186	0.401155	0.38457	0.406614	0.401768	0.39133	0.366309	0.367771	0.35875	0.360928	0.363224	0.393822	0.388546	0.360778	0.391465	0.388952	0.401662	0.434197	0.438691	0.439531
1	0.119499	0.12988	0.128525	0.139588	0.137175	0.125708	0.113348	0.108138	0.112736	0.105535	0.104929	0.104494	0.106556	0.110873	0.112983	-0.0953147	0.0468937	0.266272	0.448731	0.646819	0.78047	0.914744	1.03799	1.09977	1.19132	1.28036	1.33235	1.3737	1.41392	1.41771	1.5153	1.49644	1.46958	1.46871	1.53123	1.52219	1.54035	1.52491	1.52933	1.56287	1.51479	1.53222	1.52564	1.46761	1.48548	1.50639	1.55216	1.54346	1.49353
2	0.140016	0.13947	0.128522	0.142723	0.139226	0.139859	0.13908	0.149656	0.149084	0.137846	0.143807	0.142445	0.143427	0.149872	0.12666	0.0534995	0.171881	0.22746	0.264865	0.287434	0.301385	0.33194	0.326066	0.303031	0.320186	0.318637	0.298799	0.339122	0.330839	0.335788	0.317806	0.339689	0.364227	0.377557	0.382843	0.40995	0.386103	0.422064	0.420971	0.43277	0.458789	0.489841	0.464646	0.472189	0.504817	0.502282	0.518345	0.536983	0.578904
3	0.103129	0.113582	0.11843	0.104397	0.0961134	0.110787	0.100671	0.0954573	0.0873736	0.101385	0.108966	0.109942	0.133083	0.123425	0.147803	-0.118022	-0.0868597	-0.0592591	0.0559982	0.113132	0.210489	0.325172	0.455231	0.581086	0.607737	0.699515	0.794173	0.857234	0.95987	0.992509	1.07564	1.14967	1.27289	1.34577	1.36273	1.44169	1.52736	1.58825	1.63614	1.66006	1.72283	1.74089	1.81771	1.85779	1.93066	1.9462	2.01313	2.12128	2.09512
4	0.134689	0.126156	0.131439	0.120243	0.131129	0.12703	0.129079	0.111526	0.117695	0.112878	0.107789	0.108736	0.111977	0.118168	0.132453	-0.0638176	0.0256301	0.105518	0.167007	0.215585	0.279307	0.304275	0.336849	0.36708	0.389357	0.412684	0.440185	0.456441	0.45554	0.472836	0.442934	0.494133	0.458418	0.486866	0.485829	0.501747	0.50827	0.516981	0.503984	0.501372	0.538382	0.531558	0.528897	0.554867	0.547941	0.556335	0.525139	0.502557	0.532304
5	0.11172	0.10103	0.101152	0.105666	0.0980027	0.0843422	0.0984261	0.0923122	0.110148	0.105456	0.100572	0.101512	0.104059	0.0984758	0.100865	-0.110932	0.0455719	0.149786	0.277745	0.391358	0.4645	0.527632	0.572933	0.640009	0.638338	0.714208	0.77496	0.789619	0.826702	0.822308	0.846627	0.876392	0.916792	0.942083	0.984538	1.03855	1.05027	1.08599	1.11913	1.14453	1.18345	1.18931	1.22607	1.23426	1.24941	1.24405	1.25507	1.25637	1.26606
6	0.342576	0.299508	0.329411	0.26376	0.166785	0.120849	0.13502	0.136919	0.151583	0.187844	0.187901	0.206937	0.214766	0.211568	0.205954	0.0506406	0.10206	0.122504	0.158694	0.175337	0.182549	0.217818	0.216763	0.234653	0.248809	0.253533	0.262291	0.297564	0.313741	0.307407	0.318973	0.31429	0.345571	0.369355	0.360597	0.382293	0.390147	0.386977	0.399948	0.422429	0.446293	0.469711	0.486585	0.5209	0.543411	0.514166	0.525752	0.553552	0.562965
7	0.159284	0.138892	0.152736	0.10325	0.0988752	0.118592	0.122741	0.1196	0.126029	0.096248	0.108653	0.13645	0.136802	0.150856	0.18918	-0.0327424	0.21366	0.357868	0.556997	0.712514	0.837976	0.985027	1.1376	1.23396	1.32195	1.47715	1.64573	1.49058	1.63272	1.69574	1.76177	1.82417	1.86992	1.93982	1.92018	2.03603	2.06662	2.10777	2.15639	2.21312	2.24255	2.12689	2.22409	2.32999	2.34675	2.48716	2.47104	2.62786	2.60843
8	0.133048	0.134475	0.134422	0.129444	0.140943	0.133415	0.142769	0.128649	0.141126	0.122594	0.127864	0.11979	0.12183	0.129332	0.142116	0.109603	0.151795	0.18725	0.275414	0.300519	0.328301	0.362777	0.434815	0.505903	0.532959	0.61648	0.613033	0.689536	0.736669	0.791113	0.807486	0.852996	0.875588	0.898303	0.905747	0.948671	0.98795	0.874039	1.02269	1.00701	1.04005	1.07446	1.10339	1.11883	1.1775	1.18425	1.16927	1.18045	1.20314
9	0.149572	0.13312	0.145884	0.142689	0.147297	0.159294	0.131095	0.12316	0.124119	0.120019	0.121456	0.135789	0.116221	0.121735	0.120812	0.0688848	0.0715437	0.0957335	0.0954056	0.10819	0.130853	0.149494	0.175656	0.206385	0.216185	0.293726	0.346994	0.375262	0.417723	0.459388	0.498107	0.539925	0.594179	0.614301	0.625742	0.650495	0.697652	0.717627	0.76141	0.805185	0.870064	0.88892	0.944758	0.970988	1.03053	1.02405	1.10324	1.09703	1.15664
Normalized Fluorescence Intensity Fold Change - Actin
	Frame
Cell	0	1	2	3	4	5	6	7	8	9	10	11	12	13	14	15	16	17	18	19	20	21	22	23	24	25	26	27	28	29	30	31	32	33	34	35	36	37	38	39	40	41	42	43	44	45	46	47	48
0	0.0609728	0.0728277	0.0606141	0.0293596	0.0190063	-0.00372423	0.00333168	0.0180238	-0.00126356	-0.0048803	-0.0288312	-0.0015194	-0.0179095	-0.00186532	-0.00111773	-0.0612731	-0.16033	-0.323101	-0.388717	-0.441604	-0.458832	-0.469992	-0.478516	-0.461631	-0.460334	-0.465531	-0.457016	-0.455244	-0.438948	-0.447842	-0.42036	-0.440606	-0.424799	-0.420346	-0.408255	-0.422124	-0.406427	-0.407938	-0.396209	-0.390646	-0.390734	-0.383252	-0.380385	-0.359243	-0.360811	-0.303032	-0.337937	-0.300395	-0.306141
1	0.0285232	0.0378357	0.0447097	0.023914	0.0388159	0.0197138	0.0118735	-0.00847221	0.000276266	-0.00346019	0.000882182	-0.000169043	-0.0182111	-0.00897078	-0.0145439	-0.00850116	-0.242477	-0.375721	-0.358965	-0.347746	-0.346388	-0.32807	-0.301916	-0.303064	-0.295192	-0.286451	-0.298657	-0.273353	-0.264601	-0.248728	-0.248607	-0.222075	-0.221732	-0.247851	-0.224186	-0.242443	-0.215298	-0.219951	-0.229121	-0.215132	-0.227468	-0.225375	-0.218545	-0.2223	-0.224424	-0.211528	-0.217069	-0.211066	-0.218089
2	0.02554	-7.82363e-05	0.005423	0.00677686	0.0105669	-0.00367692	0.00263343	-0.00484042	0.00800918	-0.00101392	0.00189116	0.00436688	-0.00520606	0.000633681	0.0145956	0.0263963	-0.0373872	0.092936	0.0561456	0.0912364	0.0295174	-0.0874119	-0.169968	-0.251591	-0.305122	-0.307513	-0.291949	-0.356816	-0.371477	-0.373469	-0.361855	-0.344275	-0.393849	-0.365288	-0.355289	-0.383624	-0.348147	-0.382172	-0.373315	-0.388989	-0.383933	-0.369252	-0.389324	-0.353846	-0.345715	-0.353098	-0.347562	-0.371534	-0.338814
3	0.0231494	-0.000878747	0.0244904	0.0248284	0.0011355	-0.00395339	0.00731911	0.0015939	0.00424807	-0.000316152	0.000279833	-0.00225766	-0.0124154	-0.00629512	0.0204191	-0.147854	-0.125427	-0.199159	-0.337312	-0.41333	-0.548391	-0.533325	-0.530391	-0.493835	-0.503113	-0.494051	-0.477843	-0.501457	-0.468807	-0.466485	-0.458429	-0.460133	-0.438152	-0.443279	-0.442206	-0.434216	-0.442108	-0.425042	-0.416058	-0.423727	-0.41317	-0.430991	-0.419953	-0.40924	-0.408555	-0.391728	-0.380046	-0.378949	-0.389579
4	0.0270859	0.0131152	0.00603747	0.00725331	0.00882228	0.00775044	0.000626632	0.0106658	0.00793254	-0.00385844	-0.0223776	-0.013165	-0.012853	-0.00299815	-0.00540512	-0.166734	-0.171104	-0.201293	-0.227548	-0.213358	-0.243409	-0.239104	-0.238507	-0.248384	-0.251965	-0.245588	-0.241701	-0.2151	-0.251161	-0.244564	-0.236973	-0.251196	-0.226595	-0.248361	-0.216179	-0.25153	-0.249456	-0.220709	-0.237681	-0.246318	-0.212502	-0.219511	-0.24191	-0.239047	-0.243243	-0.259479	-0.235329	-0.237702	-0.254585
5	0.0158302	0.0250729	0.0115379	0.0152782	-0.00141887	-0.0151236	0.00353417	-0.0103908	0.0147474	-0.00598023	-0.00112809	0.000943484	0.00429724	0.011284	0.00851952	-0.0699327	-0.0980999	-0.200727	-0.254484	-0.235541	-0.290542	-0.252534	-0.281798	-0.266324	-0.255284	-0.262518	-0.278205	-0.27987	-0.28491	-0.284752	-0.269949	-0.293429	-0.283873	-0.263084	-0.28902	-0.282322	-0.274861	-0.251867	-0.256051	-0.259685	-0.249524	-0.258824	-0.246142	-0.221973	-0.235658	-0.24959	-0.243671	-0.266074	-0.264095
6	0.0403738	0.0171234	0.020431	0.0292033	0.0147607	0.00293241	0.0314728	0.0221927	0.0270869	0.0332936	0.0272076	0.0267244	0.0191986	0.0346569	0.00851081	-0.0829934	-0.0276386	0.0150469	0.0418989	0.00461831	-0.0440848	-0.0201992	-0.0683338	-0.104176	-0.128328	-0.193483	-0.21082	-0.17609	-0.248056	-0.280845	-0.246702	-0.285817	-0.309067	-0.316101	-0.29192	-0.295816	-0.290343	-0.295268	-0.300426	-0.294697	-0.306878	-0.295083	-0.313015	-0.313082	-0.302316	-0.311695	-0.330857	-0.321318	-0.308564
7	0.0478961	0.04983	0.035174	0.0253204	0.0227433	0.00039259	0.0112348	0.0210062	0.0140029	0.00316327	0.00698694	0.0308684	0.00866945	0.056714	0.109616	-0.209868	-0.467438	-0.454669	-0.543863	-0.558108	-0.580577	-0.592069	-0.582694	-0.588798	-0.580813	-0.594417	-0.581135	-0.570272	-0.575192	-0.570056	-0.555365	-0.523195	-0.528218	-0.511938	-0.525096	-0.50759	-0.549486	-0.526848	-0.535243	-0.518129	-0.517884	-0.512025	-0.509767	-0.483848	-0.496441	-0.484208	-0.484602	-0.474236	-0.492932
8	0.0191541	0.0272647	0.0389909	0.0176601	0.019021	0.00692865	-0.000243438	-0.00180224	0.00543234	-0.0026802	-0.00389284	-0.01437	-0.00352256	-0.0252622	-0.00348108	0.10232	0.369973	0.547416	0.519194	0.298572	0.164993	0.0841447	0.048745	-0.0665559	-0.0467473	-0.0525647	-0.131814	-0.0903411	-0.125755	-0.100923	-0.132143	-0.136558	-0.141748	-0.172897	-0.175621	-0.201479	-0.209214	-0.189373	-0.200461	-0.187915	-0.200911	-0.196405	-0.216631	-0.213506	-0.235117	-0.246513	-0.263548	-0.281293	-0.2607
9	0.0540958	0.0303361	0.0347124	0.0216245	0.0101559	0.0314041	0.000678325	-0.0115358	0.0101546	-0.0167992	0.00553115	-0.0171574	-0.0249792	-0.0115016	-0.0155754	-0.149549	-0.149736	-0.152227	-0.137061	-0.275388	-0.171021	-0.344659	-0.315942	-0.357589	-0.346434	-0.4001	-0.347509	-0.380726	-0.379408	-0.382242	-0.354471	-0.358181	-0.33646	-0.355237	-0.356114	-0.317712	-0.29375	-0.281048	-0.316686	-0.318501	-0.302998	-0.305427	-0.319145	-0.295094	-0.313017	-0.306142	-0.289744	-0.278609	-0.261583
Frame Interval = 1.5 s
[truncated: 66 more columns]
