# Supplementary material for: Repair of noise-induced damage to stereocilia F-actin cores is facilitated by XIRP2 and its novel mechanosensor domain
Source: eLife. 2023 Jun 9;12:e72681. doi: 10.7554/eLife.72681 (PMC10259482; doi:10.7554/eLife.72681)
Supplement: Figure 9—source data 1. [file elife-72681-fig9-data1.xlsx]

## Sheet: Fig 9A
XIRP2 Bl/6 ABRs - 11-12 weeks
	WT																				XIRP2 KO
8	30	35	35	35	40	40	35	25	35	30	30	30	25	35	30	45	30			55	30	85	30	25	85	40	105	30
11.3	40	45	40	45	40	40	35	30	35	30	35	30	40	50	40	50	25			80	35	100	40	35	90	55	95	35
16	35	30	30	35	40	25	30	25	30	35	30	25	35	45	35	45	30			90	85	95	75	90	100	90	90	40
22.4	50	30	45	45	40	30	30	30	35	30	30	25	40	40	30	50	30			80	45	85	45	50	95	50	90	35
32	65	55	55	65	60	25	50	45	50	45	45	45	55	30	25	45	40			80	65	90	60	65	90	70	90	30

## Sheet: Fig 9B
XIRP2 Bl/6 ABRs - 20 weeks
	WT															XIRP2 KO
8	70	30	45	45	25	25	40	35	40	40	65	50	70	40		105	85	110	95	120	100	120	95	80
11.3	70	35	50	60	40	25	45	40	45	50	85	60	80	45		115	100	105	90	120	105	120	115	95
16	60	40	55	40	35	25	50	40	40	60	75	55	95	45		110	100	105	85	110	100	110	110	90
22.4	65	35	50	70	40	25	40	40	35	45	65	50	75	40		90	95	100	80	100	95	100	100	75
32	55	30	60	65	55	15	65	40	45	60	70	50	75	65		90	90	90	75	90	90	90	90	80

## Sheet: Fig 9C
XIRP2 Bl/6 ABRs - 40 weeks
		WT															Xirp2 Knockout
Frequency	8	40	40	60	45	40	35	70	80	65	35						120	105	100	80	110	110	90	115	120
	11.3	65	40	60	45	40	40	90	65	70	45						110	105	105	85	110	110	90	120	120
	16	75	45	70	70	40	65	85	70	75	55						100	105	90	100	105	115	80	110	110
	22.4	55	45	65	60	40	50	85	60	60	45						90	85	90	90	90	90	80	100	100
	32	55	40	65	70	55	55	85	90	55	60						90	80	90	90	85	90	85	90	90

## Sheet: Fig 9D
XIRP2 CBA ABRs - 11-12 weeks
		WT												Xirp2 KO
	8	30	25	30	35	30	35	30	15	30	30	10		25	30	20	30	30	30	30	30	30	30	35	25
	11.3	25	35	30	65	30	25	30	25	25	20	20		30	40	20	30	25	25	30	25	25	30	35	25
	16	30	30	25	40	25	30	30	20	20	25	10		35	40	15	25	30	30	20	30	30	35	40	30
	22.4	25	20	25	40	25	25	25	20	25	15	10		25	45	15	25	35	30	20	30	30	25	30	35
	32	15	25	20	25	15	10	25	15	15	10	5		25	60	10	15	25	20	10	20	10	15	15	20

## Sheet: Fig 9E
XIRP2 CBA ABRs - 20 weeks
		WT						Xirp2 KO
	8	30	25	25	25	15	25	30	35	35	40	5	35	65	25	35	25	30	25
	11.3	30	30	30	30	15	20	30	35	20	35	15	30	55	30	25	25	25	30
	16	20	30	25	25	5	20	25	25	40	30	10	30	50	35	30	25	30	25
	22.4	20	25	20	25	5	15	30	20	30	40	5	25	45	35	30	20	30	20
	32	15	15	5	15	5	5	15	50	20	30	10	15	40	10	20	15	20	20

## Sheet: Fig 9F
XIRP2 CBA ABRs - 40 weeks
		WT							Xirp2 KO
	8	45	30	25	30	35	35		40	85	40	60	35	45	45	35	50	45	55	35
	11.3	40	35	30	25	30	30		45	70	40	50	35	40	35	35	40	40	55	45
	16	35	35	25	25	30	30		35	80	45	60	35	60	35	35	55	40	60	40
	22.4	30	25	20	15	15	20		30	75	30	40	35	45	25	30	35	30	35	30
	32	25	15	15	10	15	10		50	75	30	35	20	40	20	30	45	25	40	35

## Sheet: Fig 9G
Pre Noise ABRs - XIRP2 CBA and WT
	Pre Noise WT												Pre Noise Xirp2 KO
8	20	25	25	20	30	25	30	25	25	30	30	30	25	20	20	40	35	20	35	30	40	25	25	30	20	35
11.3	25	25	30	30	35	40	30	30	30	30	30	35	30	30	30	55	30	30	30	35	45	25	30	30	25	30
16	20	20	25	25	40	40	30	20	25	25	20	35	30	25	25	60	35	20	35	40	45	25	25	30	20	25
22.4	30	30	30	35	40	40	30	20	20	30	20	30	35	30	30	55	30	15	35	35	45	25	25	35	20	30
32	50	35	40	45	55	55	40	20	20	45	20	35	55	35	35	65	45	25	55	50	55	40	35	45	25	35

## Sheet: Fig 9H
1 day post Noise ABRs - XIRP2 CBA and WT
	1 day post WT														1 day post XIRP2
8	30	65	35	45	45		75	60	50	75	45	40			70	70	40	35	35	40	40	35	40	60	40	40	30	40
11.3	35	80	45	40	50		95	85	80	75	90	85			65	80	45	40	40	45	60	75	55	70	85	70	35	45
16	55	80	70	40	65		110	90	85	110	90	85			75	85	65	60	55	60	85	95	90	105	85	80	45	55
22.4	45	75	45	40	55		85	70	70	100	70	60			75	80	50	45	40	50	60	65	60	75	60	55	45	50
32	50	65	70	45	55		90	85	80	90	80	75			60	80	50	45	40	55	70	80	70	75	70	75	40	55

## Sheet: Fig 9I
2 weeks post Noise ABRs - XIRP2 CBA and WT
	2 weeks Post Noise WT														2 Weeks Post Noise XIRP2
8	40	40	35	30	25					25	30	45			45	30	35	50	40	20	30	30	30	45	25	60	40	50
11.3	40	45	45	35	30					25	30	50			45	35	45	65	55	35	25	30	35	55	30	65	40	45
16	55	55	45	35	25					25	25	55			60	30	55	60	65	30	30	30	35	65	25	65	40	40
22.4	45	45	45	35	30					20	25	35			45	30	45	50	60	30	35	30	45	55	30	55	40	55
32	45	50	45	40	40					25	45	50			50	35	45	65	65	35	50	40	50	70	35	80	45	55

## Sheet: Fig 9J
Threshold Change between 1 day post noise and 2 weeks post noise for individual mice
		WT												XIRP2 KO
	8	10	-25	0	-15	-20					-50	-15	5	-25	-40	-5	15	5	-20	-10	-5	-10	-15	-15	20
	11.3	5	-35	0	-5	-20					-50	-60	-35	-20	-45	0	25	15	-10	-35	-45	-20	-15	-55	-5
	16	0	-25	-25	-5	-40					-85	-65	-30	-15	-55	-10	0	10	-30	-55	-65	-55	-40	-60	-15
	22.4	0	-30	0	-5	-25					-80	-45	-25	-30	-50	-5	5	20	-20	-25	-35	-15	-20	-30	0
	32	-5	-15	-25	-5	-15					-65	-35	-25	-10	-45	-5	20	25	-20	-20	-40	-20	-5	-35	5
